# Supplementary material for: microRNA-203 suppresses invasion and epithelial-mesenchymal transition induction via targeting NUAK1 in head and neck cancer
Source: PubMed Central journal article supplement (PMC4884988; doi:10.18632/oncotarget.6972), 2016-01-22
Supplement: oncotarget-07-8223-s001.pdf [file oncotarget-07-8223-s001.pdf]

SUPPLEMENTARY FIGURES AND TABLES

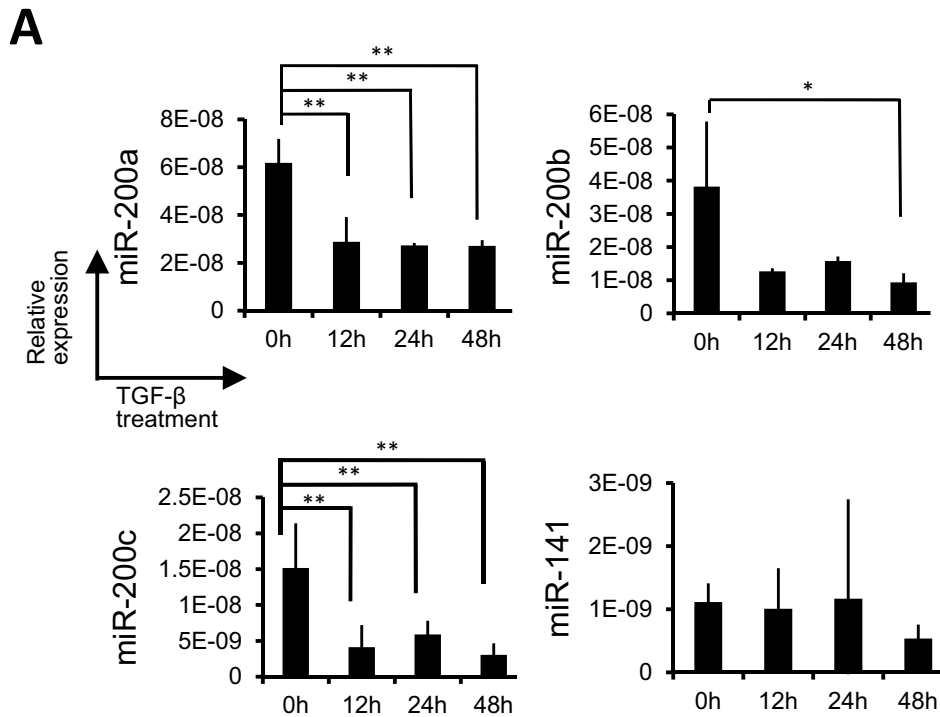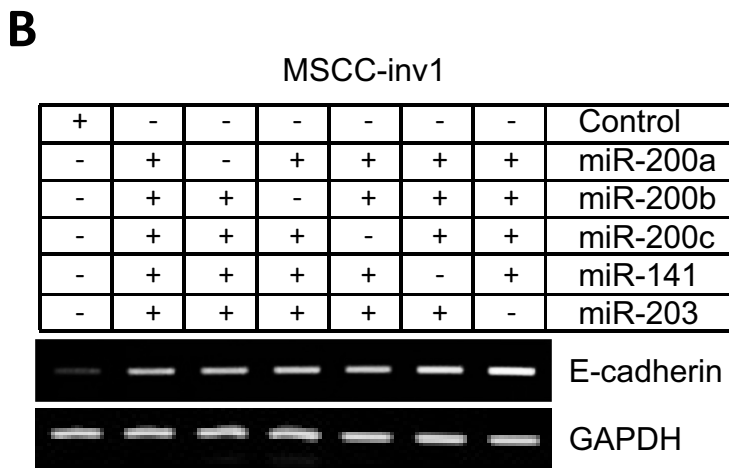

**Supplementary Figure S1: A.** Expression of miR-200a, -200b, -200c, and -141 was examined by real-time PCR at 0, 12, 24, and 48 h (n = 3) after 10 ng/mL of TGF-β treatment in NMuMG cells. The graph shows the expression of these miRNAs (miRNA/U6). All results are presented as means ± SD. \*\**P* < 0.01, \**P* < 0.05. **B.** The mature miR-200a, -200b, -200c, -141, and -203 were transfected into MSCC-inv1 cells with EMT features. Moreover, we removed one of the miRNAs from transfection with all five miRNAs (miR-200a, -200b, -200c, -141, and -203). After 72 h of transfection, the expression of E-cadherin mRNA was examined by RT-PCR. GAPDH expression was used as a control.

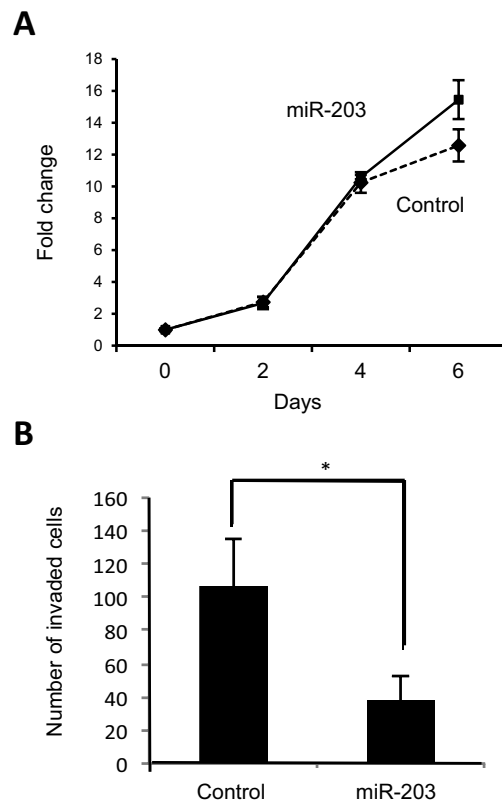

**Supplementary Figure S2: A.** The graph shows cell growth of control miRNA or miR-203 transfected MSCC-inv1 cells at 0, 2, 4, and 6 day (n = 3). The result is presented as means  $\pm$  SD and  $P < 0.05$  was considered significant. **B.** The graph shows invasion capability of control miRNA or miR-203 transfected MSCC-inv1 cells. The invasiveness of the cells was determined by *in vitro* invasion assay for 20 h. \* $P < 0.05$ .

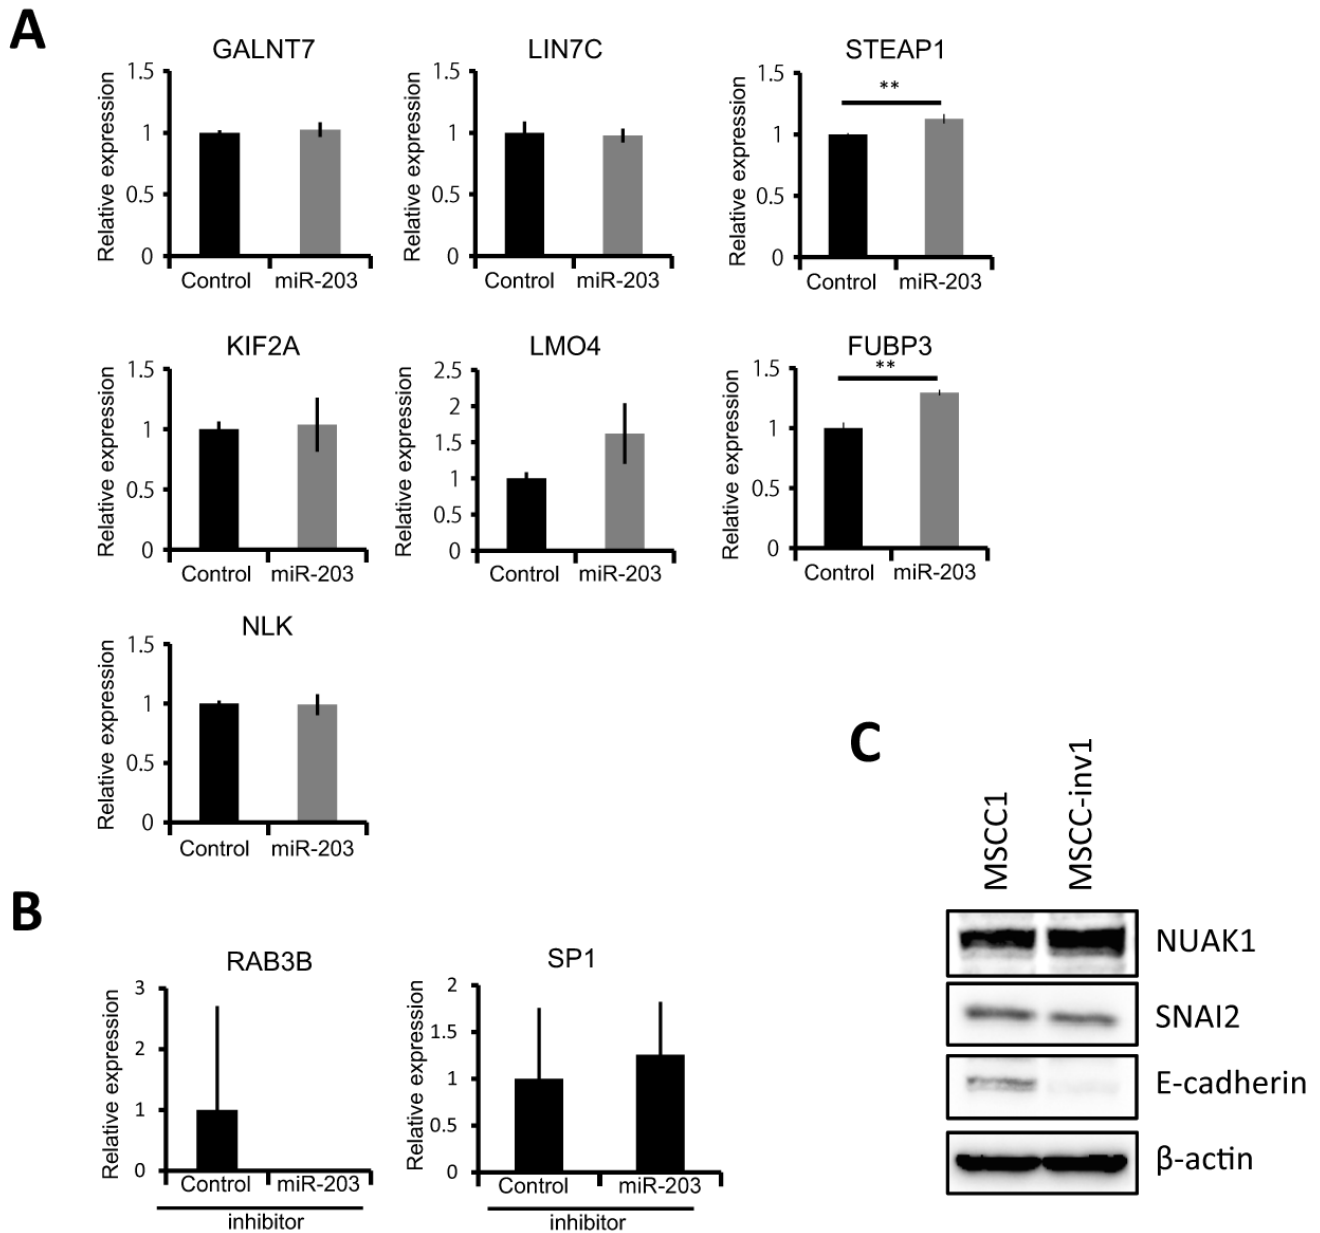

**Supplementary Figure S3: A.** The graph shows the expression of candidate genes of miR-203 (GALNT7, KIF2A, NLK, LIN7C, LMO4, STEAP1, and FUBP3) in control- or mature miR-203-transfected MSCC-inv1 cells. The graph shows the expression of these mRNAs (mRNA/GAPDH). The results are presented as means  $\pm$  SD. **\*\*** $P < 0.01$ . **B.** The graph shows the expression of candidate genes of miR-203 (RAB3B and SP1) in control- or miR-203 inhibitor- transfected HSC2 cells. OCLN expression was not observed in either the control- or miR-203 inhibitor-transfected HSC2 cells. The graph shows the expression of these mRNAs (mRNA/GAPDH). The results are presented as means  $\pm$  SD. **C.** Expression of NUA1, SNAI2, and E-cadherin was examined in MSCC-1 and MSCC-inv1 cells by western blotting analysis.  $\beta$ -actin expression was used as a loading control.

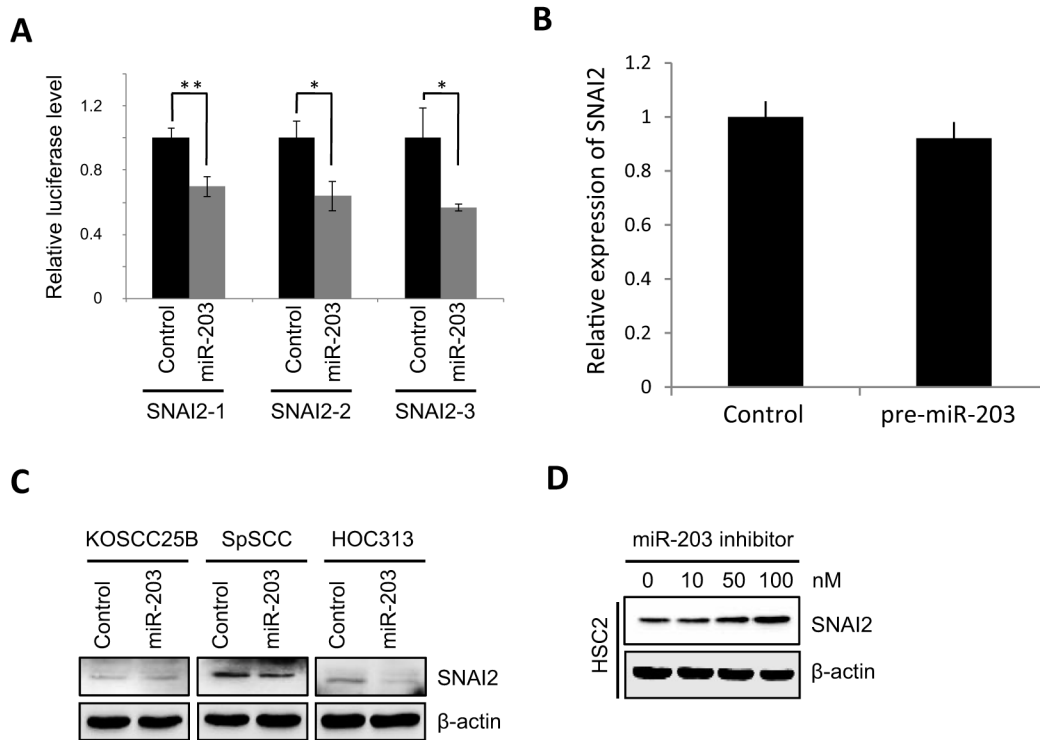

**Supplementary Figure S4:** **A.** Luciferase assays were performed with a pmirGLO vector containing the putative miR-203 binding sites of SNAI2, and the graph shows the relative luciferase activity in mature miR-203- or control miRNA-transfected cells. The data were normalized to control-transfected samples and the results are presented as means  $\pm$  SD. **\*\*** $P < 0.01$ , **\*** $P < 0.05$ . **B.** Expression vector of pre-miR-203 or scramble negative control vector was transfected into MSCC-inv1 cells. Expression of SNAI2 mRNA was examined by real-time PCR in control- and pre-miR-203-infected MSCC-inv1 cells. The graph shows the expression of these mRNAs (mRNA/GAPDH). The results are presented as means  $\pm$  SD. **C.** SNAI2 expression was examined in control- or mature miR-203-transfected HNSCC cells (KOSCC25B, SpSCC, and HOC313) by western blotting analysis.  $\beta$ -actin was used as a loading control. **D.** SNAI2 expression was examined in control- or miR-203 inhibitor-transfected HSC2 cells by western blotting analysis.  $\beta$ -actin was used as a loading control.

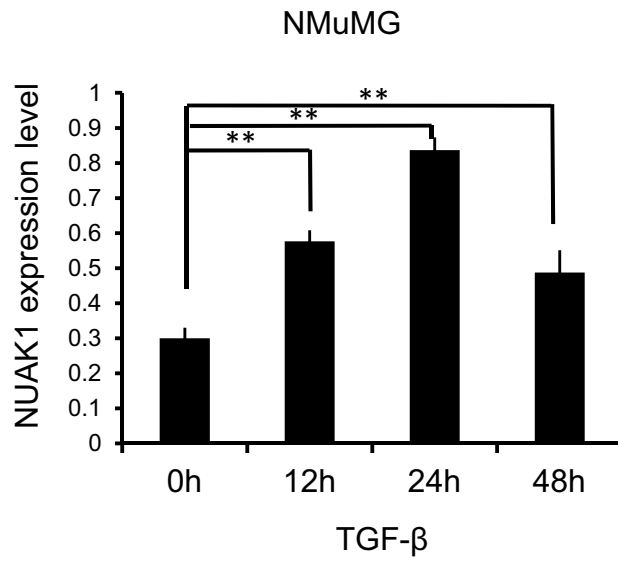

**Supplementary Figure S5:** Expression of NUAK1 was examined by real-time PCR at 0, 12, 24, and 48 h (n = 3) after 10 ng/mL of TGF-β treatment in NMuMG cells. The graph shows NUAK1/GAPDH and the results are presented as means ± SD. \*\*P < 0.01.

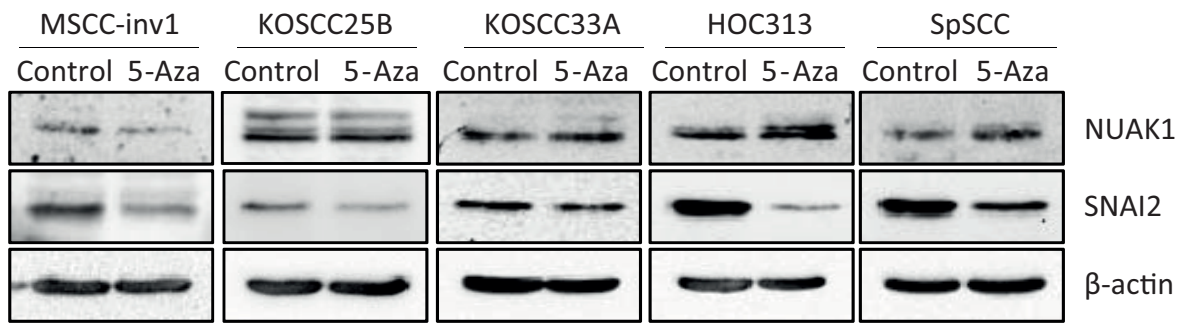

**Supplementary Figure S6:** Expression of NUAK1 and SNAI2 in 5-aza-dC-treated HNSCC cells. EMT-induced cells (MSCC-inv1, HOC313, KOSCC25B, KOSCC33A, and SpSCC) were treated with 5-aza-dC. NUAK1 and SNAI2 expression was examined in EMT-induced cells by western blotting analysis.  $\beta$ -actin was used as a loading control for 4 d.

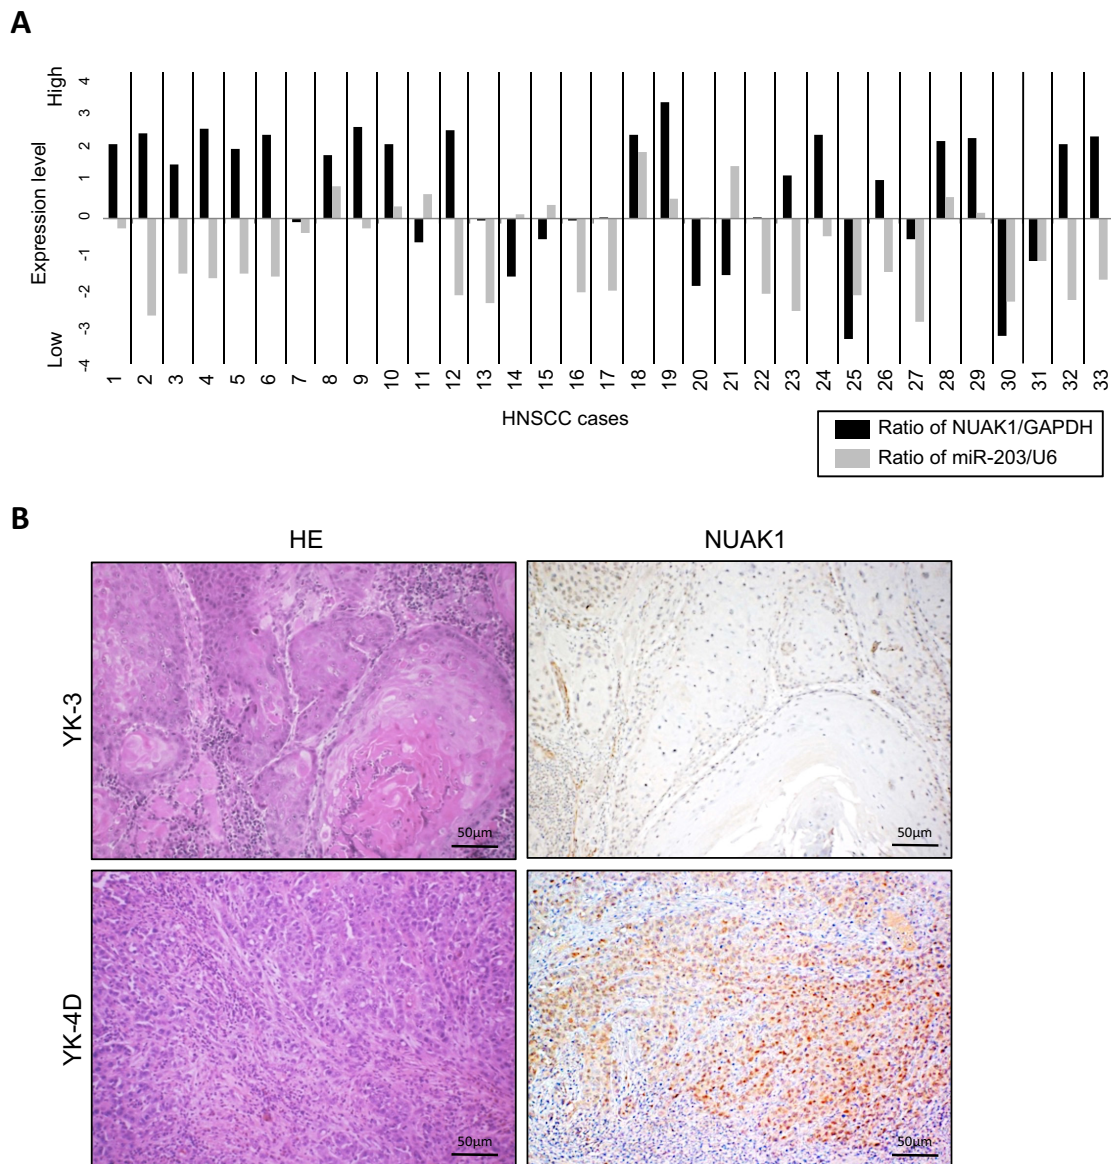

**Supplementary Figure S7: A.** Expression of NUAK1 and miR-203 was examined in 33 HNSCC tissues by real-time PCR. The graph shows expression ratio of NUAK1/GAPDH and miR-203/U6 in each HNSCC case. **B.** NUAK1 expression was compared with invasion pattern in 54 HNSCC cases. For evaluation of invasion pattern, we used the YK classification. Of the 54 cases, no case was classified as YK-1. Representative pictures of hematoxylin and eosin staining and NUAK1 expression in HNSCC cases with YK-3 or YK-4D classifications are shown.

Supplemental Table 1: List of candidate genes of miR-203 target

| Gene symbol   | Description                                                      | Previous reports |          |     | Ratio miR-203/<br>Control |
|---------------|------------------------------------------------------------------|------------------|----------|-----|---------------------------|
|               |                                                                  | Cancer           | Invasion | EMT |                           |
| ACSL3         | fatty acid metabolism                                            | •                |          |     | 2.8                       |
| AFF4          | transcription elongation factor                                  | •                |          |     | 4.7                       |
| ARID1B        | chromatin-remodeling gene                                        | •                |          |     | 2.9                       |
| ARID2         | chromatin-remodeling                                             | •                |          |     | 2.2                       |
| BPTF          | chromatin-mediated regulation of transcription                   | •                |          |     | 2.2                       |
| C14orf129     | negative regulator of GSK3-beta                                  |                  |          |     | 14.6                      |
| CALML4        | chondrogenesis                                                   |                  |          |     | 2.3                       |
| CASK          | calcium/calmodulin-dependent serine protein kinase               | •                |          |     | 5.3                       |
| CBL           | E3 ubiquitin ligase                                              | •                |          |     | 2.4                       |
| CEP68         | centrosome cohesion                                              |                  |          |     | 2.6                       |
| CHD9          | regulator of the chromatin remodelling process                   | •                |          |     | 2.1                       |
| CHORDC1       | ADP-dependent HSP90 interacting protein/ mouse brain development |                  |          |     | 8.0                       |
| CLSTN3        | calcium-mediated postsynaptic signals                            | •                |          |     | 6.8                       |
| COL4A4        | one of the six subunits of type IV collagen                      |                  |          |     | 2.4                       |
| COX15         | the terminal component of the mitochondrial respiratory chain    |                  |          |     | 4.1                       |
| CXorf23       | -                                                                |                  |          |     | 12.9                      |
| DCP2          | degradation of mRNAs                                             |                  |          |     | 4.0                       |
| ELOVL6        | fatty acid elongation                                            |                  |          |     | 3.5                       |
| FAT3          | tumor suppression and planar cell polarity (PCP)                 |                  |          |     | 2.6                       |
| FBXO44        | F-box protein family                                             | •                |          |     | 2.5                       |
| <b>FUBP3</b>  | regulate the expression of the c-myc oncogene                    | •                |          |     | 37.2                      |
| <b>GALNT7</b> | GalNAc-transferase family                                        | •                | •        |     | 2.7                       |
| GJB6          | connexin30 protein of gap junction                               | •                |          |     | 2.7                       |
| ITPR2         | release of intracellular calcium                                 | •                |          |     | 2.3                       |
| JOSD1         | deubiquitination                                                 |                  |          |     | 2.5                       |
| KCTD9         | potassium channel gene                                           |                  |          |     | 3.2                       |
| KIAA1009      | microtubule-associated ATPase involved in cell division          |                  |          |     | 20.1                      |
| KIAA1147      | neuritogenesis                                                   |                  |          |     | 8.8                       |
| <b>KIF2A</b>  | microtubule dynamics                                             | •                | •        |     | 2.4                       |
| KLHL15        | protein ubiquitination and cytoskeletal organization             |                  |          |     | 7.5                       |
| LCORL         | spermatogenesis, height                                          |                  |          |     | 22.2                      |
| <b>LIN7C</b>  | cellular polarity                                                | •                | •        |     | 2.1                       |

(Continued)



|               |                                                                                                           |   |   |   |      |
|---------------|-----------------------------------------------------------------------------------------------------------|---|---|---|------|
| <b>LMO4</b>   | transcriptional coregulatory protein                                                                      | • | • |   | 3.6  |
| MAGI1         | scaffolding protein at cell-cell junctions                                                                |   |   |   | 2.8  |
| MIDN          | neurogenesis, contains a Ubiquitin-like domain                                                            |   |   |   | 2.3  |
| <b>NLK</b>    | serine/threonine protein kinase involved in Wnt/ $\beta$ -catenin signalling                              | • | • | • | 2.5  |
| <b>NUAK1</b>  | tolerance to glucose starvation, suppress apoptosis                                                       | • | • |   | 6.0  |
| <b>OCLN</b>   | integral membrane protein of TJ                                                                           | • | • |   | 2.9  |
| PACS2         | recruit Bim and Bax to lysosomes to release cathepsin B and induce TRAIL-induced apoptosis                |   |   |   | 2.5  |
| PAPSS2        | sulfate source, increase phosphorylated Smad 2/3                                                          |   |   |   | 2.2  |
| PITPNB        | Catalyzes the transfer of PtdIns and phosphatidylcholine between membranes                                |   |   |   | 2.3  |
| <b>PKD2</b>   | calcium permeable cation channel                                                                          | • | • |   | 2.0  |
| PPM1D         | PP2C family(negative regulators of cell stress response pathways)                                         | • |   |   | 5.3  |
| PRELP         | anchor basement membranes to the underlying connective tissue                                             | • |   |   | 2.2  |
| PRKAB1        | fatty acid synthesis(regulatory subunit of AMPK)                                                          | • |   |   | 3.5  |
| <b>RAB3B</b>  | member RAS oncogene family                                                                                | • | • |   | 3.1  |
| RASAL2        | GAPs function as activators of Ras superfamily of small GTPases                                           |   |   |   | 2.2  |
| RBM25         | regulator of alternative pre-mRNA splicing, apoptosis                                                     |   |   |   | 2.9  |
| SHMT1         | Interconversion of serine and glycine, folate metabolism                                                  | • |   |   | 2.2  |
| SLC25A36      | ?                                                                                                         | • |   |   | 2.0  |
| <b>SNAI2</b>  | transcriptional repressor that binds to E-box motifs                                                      | • | • | • | 2.3  |
| SNN           | toxic effects of organotins                                                                               |   |   |   | 11.7 |
| <b>SP1</b>    | Transcription factor, Binds with high affinity to GC-rich motifs, cell growth, apoptosis, differentiation | • | • | • | 11.3 |
| SPTBN1        | calcium-dependent movement                                                                                | • |   |   | 6.9  |
| SS18L1        | transcriptional co-activator                                                                              | • |   |   | 2.0  |
| <b>STEAP1</b> | cell surface antigen significantly expressed at cell-cell junction                                        | • | • |   | 2.7  |
| TAF9B         | involved in initiation of transcription by RNA polymerase II                                              |   |   |   | 7.9  |
| TUSC2         | tumor suppressor                                                                                          |   |   |   | 2.1  |
| UBE2I         | ubiquitin-conjugating enzyme, sumoylation                                                                 | • |   |   | 2.0  |
| <b>VEGFA</b>  | angiogenesis, migration, inhibit apoptosis                                                                | • | • | • | 13.6 |
| ZBTB7B        | Transcriptional repressor of ECM                                                                          |   |   |   | 5.7  |
| ZRANB2        | BMP suppressor that forms a complex with Smads                                                            | • |   |   | 2.7  |
| ZXDB          | promote transcription of MHC class I and II                                                               |   |   |   | 2.6  |

Supplemental Table 2: List of primer sequences

| Primer           | F/R    | Sequence                                                                                     | Product size (bp) |
|------------------|--------|----------------------------------------------------------------------------------------------|-------------------|
| GALNT7           | F<br>R | TACCTTGATGCCCACTGTGA<br>AGCATACTCCAATCCCATGC                                                 | 188               |
| LIN7C            | F<br>R | CCGCACAAGGAAAGGTAAAA<br>TGGCATTGCAGCCATTAGTA                                                 | 190               |
| OCLN             | F<br>R | ATGCCTAGCTACCCCATCT<br>GAATGCCAATCCTGCATTCT                                                  | 181               |
| KIF2A            | F<br>R | TGCTCACCTTTTCCTGCTTT<br>CCGTTCAATGATATGGCACA                                                 | 184               |
| LMO4             | F<br>R | GGAGGCTGAGGTTGTA CTGC<br>CTACATGGCTCCACGGCTAT                                                | 193               |
| PKD2             | F<br>R | AGCCTGGATGACTCTGAGGA<br>TGGCTCGCTCCATAATCTCT                                                 | 199               |
| NLK              | F<br>R | CCAGGGAATCTCCTTGTGAA<br>TCCCACAGACCAGATGTCAA                                                 | 186               |
| SP1              | F<br>R | ACTACTGACGCAGGCACCTT<br>CCTAGTGAAAGCCCCCTACC                                                 | 188               |
| RAB3B            | F<br>R | ATGGAAGTGGCAGTGATTCC<br>CACAGCTGGATGGTCCTTTT                                                 | 191               |
| NUAK1            | F<br>R | CAGCGTGTGTGACTGTGATG<br>TGCATCCTGACCAGACTGAG                                                 | 217               |
| STEAP1           | F<br>R | GCCCTTCAGAACTTCAGCAC<br>ATGGAAACCATTGGCAAGAC                                                 | 199               |
| SNAI2            | F<br>R | GAGCATTTCAGACAGGTCA<br>GCTTCGGAGTGAAGAAATGC                                                  | 200               |
| VEGFA            | F<br>R | AAGGAGGAGGGCAGAATCAT<br>ATCTGCATGGTGTGTTGGA                                                  | 226               |
| FUBP3            | F<br>R | TCAAAAGCATCAACCAGCAG<br>GAGCTCCTTGGAGGAAAGGT                                                 | 244               |
| E-cadherin       | F<br>R | TGCCAGAAAATGAAAAAGG<br>GGATGACACAGCGTGAGA                                                    | 225               |
| ZEB1             | F<br>R | TGCACTGAGTGTGGAAAAGC<br>TGGTGATGCTGAAAGAGACG                                                 | 225               |
| ZEB2             | F<br>R | TGCCAAGAGAGGAAGAGGAA<br>GTGTCACTGCGCTGAAGGTA                                                 | 225               |
| GAPDH            | F<br>R | GCATCCTGGGCTACACTGAG<br>TCCACCACCCTGTTGCTGTA                                                 | 163               |
| hsa-miR-203 U    | F<br>R | GGGTTGTGGAGGATTAGTT<br>AAACAATAAACTCCAAACA                                                   |                   |
| hsa-miR-203 M    | F<br>R | GGGTCGTGGAGGATTAGTC<br>AAACGACTAACTCCGAACG                                                   |                   |
| NUAK1-3UTR-pcDNA | F<br>R | GCTGGATATCTGCAGCTGTGA<br>CAACAGACTGAAAAAGGAT<br>AGTCCAGTGTGGTGGCAAAAA<br>CCAAAATGAAACAAAAATC |                   |

**Supplemental data 1**

See Supplementary File 1

**Supplemental data 2**

See Supplementary File 2
